# Supplementary material for: Hybrid Argon Plasma Coagulation for Barrett’s Esophagus and for Colonic Mucosal Resection—A Systematic Review and Meta-Analysis
Source: MDPI journal article supplement (doi:10.3390/biomedicines11041139), 2023-04-10
Supplement: s1 [file s1]

## Supplementary Materials

**Supplementary Table S1.** Search strategy (date of last access 15<sup>th</sup> December 2022).

| Search engine                                            | Terms and keywords                                                                                                               | Results |
|----------------------------------------------------------|----------------------------------------------------------------------------------------------------------------------------------|---------|
| PubMed                                                   | “(hybrid argon plasma coagulation OR argon plasma coagulation) AND (colon OR endoscopic mucosal resection OR Barrett esophagus)” | 419     |
| Scopus                                                   | “(argon AND plasma AND coagulation) AND (Barrett AND esophagus OR colon)”                                                        | 526     |
| Web of Science                                           | “hybrid argon plasma coagulation”                                                                                                | 25      |
| Cochrane Central Register of Controlled Trials (CENTRAL) | “hybrid argon plasma coagulation”                                                                                                | 9       |

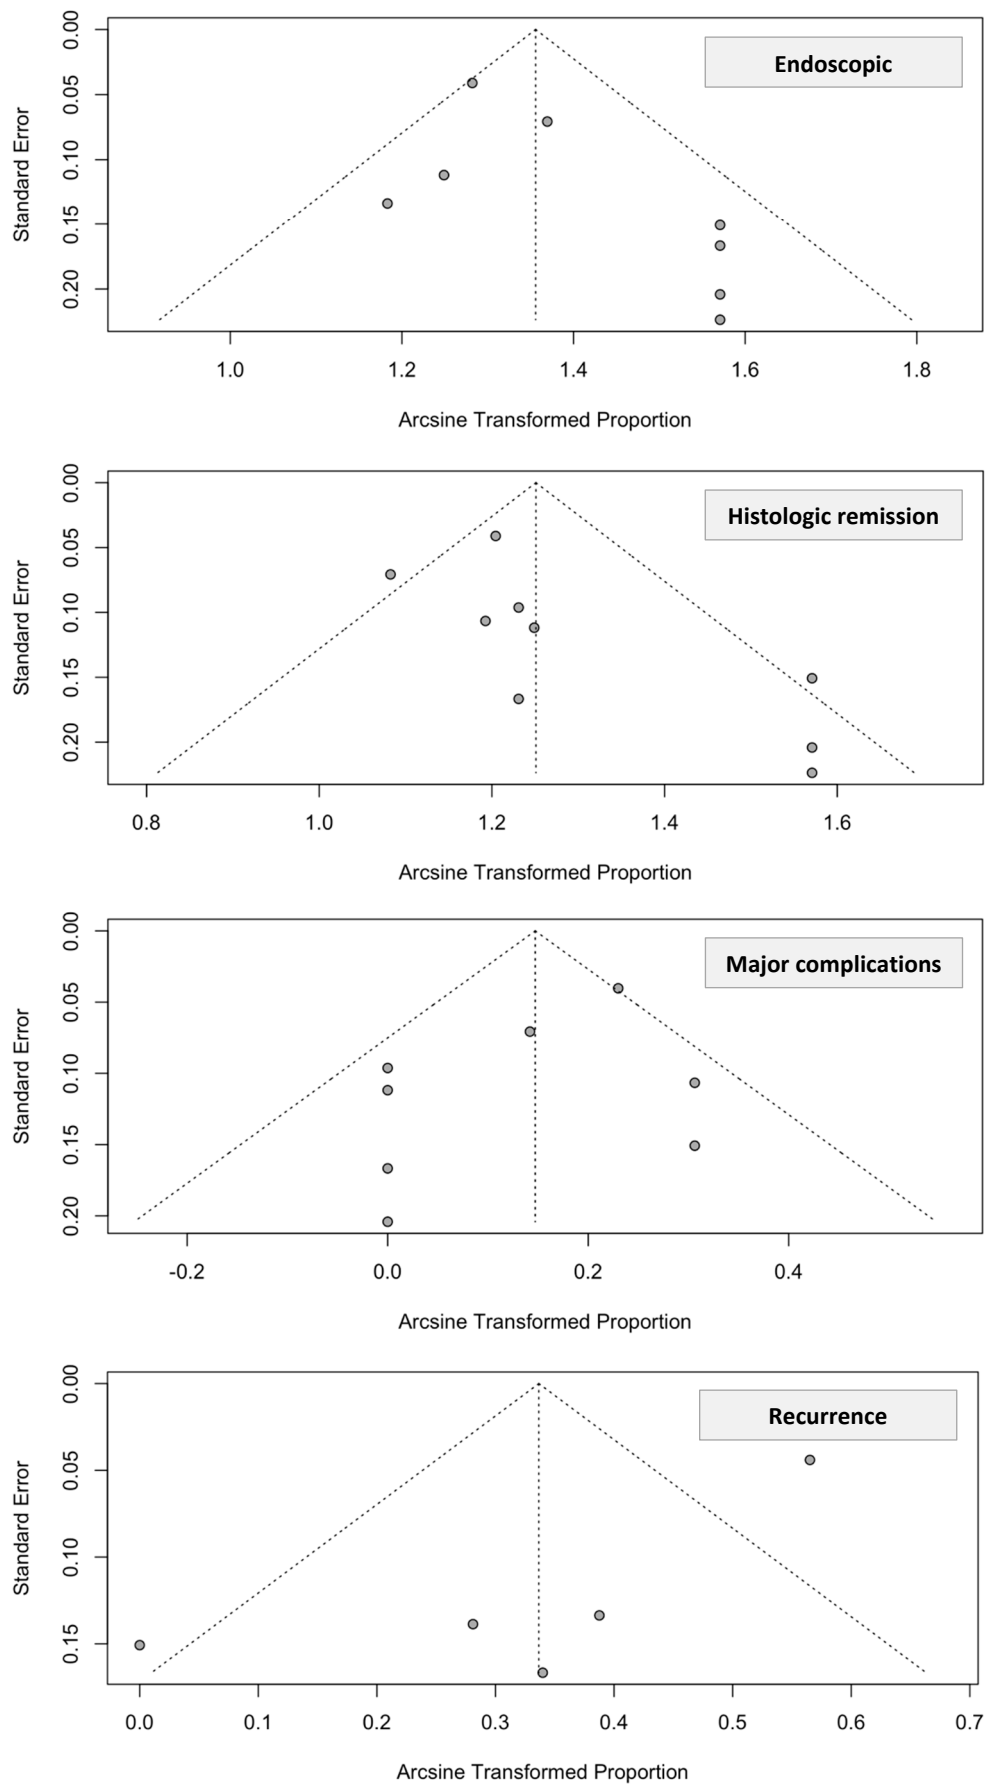

**Supplementary Figure S1.** Funnel plots for the proportions of outcomes' achievement after hybrid argon plasma coagulation (hAPC) for Barrett esophagus (BE) ablation.

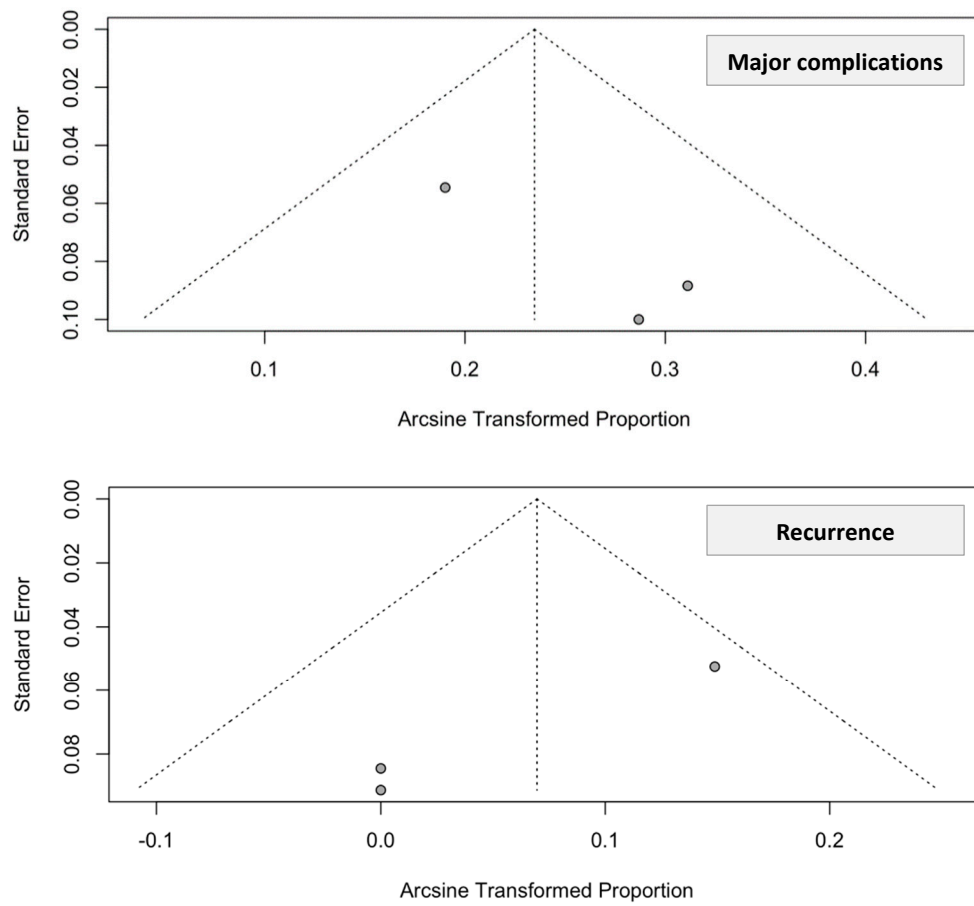

**Supplementary Figure S2.** Funnel plots for the proportions of outcomes' achievement after hybrid argon plasma coagulation (hAPC)-assisted endoscopic mucosal resection (EMR) of colonic lesions with more than 20 mm.

| CASP criteria                 |   |   |   |   |    |    |    |    |   |   |   |    |    |
|-------------------------------|---|---|---|---|----|----|----|----|---|---|---|----|----|
| Study                         | 1 | 2 | 3 | 4 | 5a | 5b | 6a | 6b | 7 | 8 | 9 | 10 | 11 |
| Knabe et al., 2022            | ● | ● | ● | ● | ●  | ●  | ●  | ●  | ● | ● | ● | ●  | ●  |
| Levenick et al., 2022         | ● | ● | ● | ● | ●  | ●  | ●  | ●  | ● | ● | ● | ●  | ●  |
| Morales Martínez et al., 2022 | ● | ● | ● | ● | ●  | ●  | ●  | ●  | ● | ● | ● | ●  | ●  |
| Motchum et al., 2022          | ● | ● | ● | ● | ●  | ●  | ●  | ●  | ● | ● | ● | ●  | ●  |
| Motz et al., 2022             | ● | ● | ● | ● | ●  | ●  | ●  | ●  | ● | ● | ● | ●  | ●  |
| Armenteros Torres, 2021       | ● | ● | ● | ● | ●  | ●  | ●  | ●  | ● | ● | ● | ●  | ●  |
| Kashin et al., 2021           | ● | ● | ● | ● | ●  | ●  | ●  | ●  | ● | ● | ● | ●  | ●  |
| Shimizu et al., 2021          | ● | ● | ● | ● | ●  | ●  | ●  | ●  | ● | ● | ● | ●  | ●  |
| Staudenmann et al., 2021      | ● | ● | ● | ● | ●  | ●  | ●  | ●  | ● | ● | ● | ●  | ●  |
| Linn et al., 2020             | ● | ● | ● | ● | ●  | ●  | ●  | ●  | ● | ● | ● | ●  | ●  |
| Trindade et al., 2020         | ● | ● | ● | ● | ●  | ●  | ●  | ●  | ● | ● | ● | ●  | ●  |
| Nieto and Casas, 2019         | ● | ● | ● | ● | ●  | ●  | ●  | ●  | ● | ● | ● | ●  | ●  |
| Manner et al., 2016           | ● | ● | ● | ● | ●  | ●  | ●  | ●  | ● | ● | ● | ●  | ●  |

● Yes | ● Can't tell | ● No

**Supplementary Figure S3.** Results of the reporting quality analysis, using the Critical Appraisal Skills Programme (CASP) checklist. Checklist criteria: 1. Did the study address a clearly focused issue?; 2. Was the cohort recruited in an acceptable way?; 3. Was the exposure accurately measured to minimize bias?; 4. Was the outcome accurately measured to minimize bias?; 5a. Have the authors identified all important confounding factors?; 5b. Have they take account of the confounding factors in the design and/or analysis?; 6a. Was the follow up of subjects complete enough?; 6b. Was the follow up of subjects long enough? 7. Are the results precise?; 8. Do you believe the results?; 9. Can the results be applied to the local population?; 10. Do the results of this study fit with other available evidence?; 11. Does this study have practical implications?
